# Supplementary material for: Evaluation of Drought Tolerance in USDA Tomato Germplasm at Seedling Stage
Source: Preprints.org preprint supplement (doi:10.20944/preprints202312.1931.v1), 2023-12-28
Supplement: Supplementary file 3 [file supplementary]

## Sheet: S1.Table.line
Supplementary Table S1. The 68 tomato accession ID, name, taxonomy, origin, country, and 14 traits for measuring drought tolerance.
Accession	NAME	TAXONOMY	ORIGIN	LW-d6	LW-d10	LR-d6	LR-d10	SPAD_healthy	SPAD_stress	SPAD_AD	SPAD_II	SPAD_RDT	PlHt_healthy	PlHt_stress	PlHt_AD	PlHt_II	PlHt_RDT	Country	No. accessions in Country
PI636277	Coure di Bue	Solanum lycopersicum L.	Argentina	7.11111	8.55556	7.33333	9	30.9126	12.1248	18.7878	60.7683	39.2317	29.0556	10.6667	18.3889	63.2887	36.7113	Argentina	1
PI330342	Queensland 2 or Q2	Solanum lycopersicum L.	Australia	8	9	8	9	34.6185	12.4052	22.2133	64.0925	35.9075	23.1111	9.72222	13.3889	57.9327	42.0673	Australia	1
PI647447	Tomate del Lugar	Solanum lycopersicum L.	Bolivia	8.33333	9	8.33333	9	32.0593	12.683	19.3763	60.2207	39.7793	27.7111	11.5556	16.1556	58.2999	41.7001	Bolivia	1
PI441739	BGH 4690	Solanum lycopersicum L.	Brazil	7.88889	9	7.55556	9	32.6852	13.2122	19.473	59.4806	40.5194	32.5556	14.5	18.0556	55.4608	44.5392	Brazil	2
PI367937	BGH 24	Solanum lycopersicum L.	Minas Gerais, Brazil	8	9	8	9	32.2085	11.7652	20.4433	63.5416	36.4584	29.4444	13.5667	15.8778	53.9245	46.0755
PI466917	Slava	Solanum lycopersicum L.	Bulgaria	7.11111	9	7.22222	9	29.8815	12.5226	17.3589	57.9914	42.0086	27.6667	11.4667	16.2	58.5542	41.4458	Bulgaria	2
PI647453	Ideal	Solanum lycopersicum L. var. lycopersicum	Bulgaria	6.66667	9	7.11111	9	32.363	12.6404	19.7226	60.9432	39.0568	24.1111	10.5333	13.5778	56.3134	43.6866
PI370091	Vision	Solanum lycopersicum L.	Canada	2.55556	4	2.55556	3.44444	33.5444	18.827	14.7174	43.9176	56.0824	28.6667	10.9778	17.6889	61.7054	38.2946	Canada	9
PI451967	Sub-Arctic Maxi	Solanum lycopersicum L.	Canada	7.22222	8.77778	6.77778	8.77778	29.6381	12.687	16.9511	57.1149	42.8851	29.6667	13.3444	16.3222	55.0187	44.9813
PI647122	High Crimson	Solanum lycopersicum L.	Canada	6.55556	7.33333	7	9	31.7481	12.4263	19.3219	60.7043	39.2957	25.4667	12.5111	12.9556	50.8726	49.1274
PI279817	Scotia	Solanum lycopersicum L.	Canada	7.55556	9	7.55556	9	31.5852	12.9504	18.6348	59.053	40.947	25.7444	10.3444	15.4	59.8187	40.1813
PI451962	New Sidor	Solanum lycopersicum L.	Canada	7.11111	9	7.44444	9	30.9	11.9667	18.9333	61.2322	38.7678	23.1111	10.2889	12.8222	55.4808	44.5192
PI645361	Vendor	Solanum lycopersicum L.	Ontario, Canada	5.55556	8.33333	6.88889	9	34.1741	11.5444	22.6296	66.2151	33.7849	21.5333	11.0667	10.4667	48.6068	51.3932
PI279815	Manitoba	Solanum lycopersicum L.	Canada	7.77778	9	7.66667	9	32.3074	12.7856	19.5219	60.439	39.561	17.9444	9.8	8.14444	45.387	54.613
PI451970	Trimson	Solanum lycopersicum L.	Canada	8.33333	9	8.33333	9	31.2259	12.5844	18.6415	59.6556	40.3444	20.6667	11.5333	9.13333	44.1935	55.8065
PI339914	Coldset	Solanum lycopersicum L.	Ontario, Canada	8	9	8	9	33.1661	12.8733	20.2928	61.1875	38.8125	29.7778	12.4444	17.3333	58.209	41.791
PI647445	Zhongza No. 4	Solanum lycopersicum L. var. lycopersicum	China	7.22222	8.11111	7.77778	8.11111	32.1	12.8959	19.2041	59.825	40.175	20.9444	11.3	9.64444	46.0477	53.9523	China	4
PI433016	New Zealand pink	Solanum lycopersicum L.	China	8	9	8	9	30.9556	12.7937	18.1619	58.6666	41.3334	34.2222	12.6778	21.5444	62.9545	37.0455
PI158760	Chih-mu-tao-se	Solanum lycopersicum L.	China	7.22222	8.66667	7	8.66667	33.2222	11.107	22.1152	66.4451	33.5549	25.5	11.5778	13.9222	54.5969	45.4031
PI291337	Hong Kong	Solanum lycopersicum L.	China	6.22222	9	7.33333	9	34.5593	12.2178	22.3415	64.8487	35.1513	25.4778	13.0111	12.4667	48.9315	51.0685
PI505317	1091-Chonto 21 (Mataverde) (3-21-2)	Solanum lycopersicum L.	Colombia	7.55556	8.55556	7.88889	8.88889	31.5893	12.2196	19.3696	61.1295	38.8705	31	14.0333	16.9667	54.7312	45.2688	Colombia	1
PI212062	Turrialba	Solanum lycopersicum L.	Costa Rica	7	9	8	9	32.8407	12.3974	20.4433	62.217	37.783	20.7778	9.98889	10.7889	51.9251	48.0749	Costa Rica	1
PI250436	Stupice	Solanum lycopersicum L.	Central Bohemia, Czech Republic	8	9	8	9	31.5259	12.6881	18.8378	59.6715	40.3285	24.6667	11.1556	13.5111	54.7748	45.2252	Czech Republic	1
PI390510	W-C 1050	Solanum lycopersicum L. var. cerasiforme (Alef.) Voss	Ecuador	2.88889	3.66667	2.66667	3.77778	33.8111	18.1722	15.6389	46.1748	53.8252	28.5556	12.4556	16.1	56.3813	43.6187	Ecuador	2
PI258474	LA0410	Solanum lycopersicum L.	Ecuador	7	9	8.33333	9	30.1567	12.6096	17.547	58.2633	41.7367	30.7	12	18.7	60.9121	39.0879
PI273115	1629	Solanum lycopersicum L.	El Salvador	8	9	8	9	33.1678	11.9389	21.2289	63.9127	36.0873	30.8889	12.5667	18.3222	59.3165	40.6835	El Salvador	1
PI639213	Juane Flamme	Solanum lycopersicum L. var. lycopersicum	France	7.22222	9	7.33333	9	30.9556	12.6756	18.28	58.827	41.173	29.2778	10.9111	18.3667	62.7324	37.2676	France	3
PI109836	Precoce des Halles	Solanum lycopersicum L.	France	8	9	8	9	30.9815	12.5381	18.4433	59.5935	40.4065	27.6667	12.4	15.2667	55.1807	44.8193
PI109831	De Marmande	Solanum lycopersicum L.	France	8	9	8	9	32.7148	12.9589	19.7559	60.1814	39.8186	28.2222	11.7778	16.4444	58.2677	41.7323
PI647531	Riesentraube	Solanum lycopersicum L.	Germany	8.88889	9	9	9	34.3667	12.2415	22.1252	64.3755	35.6245	27.0333	10.7	16.3333	60.4192	39.5808	Germany	1
PI438587	Mandarina	Solanum lycopersicum L.	Guatemala	6.22222	9	6.44444	9	30.6296	11.3944	19.2352	62.8003	37.1997	30.2222	11.7444	18.4778	61.1397	38.8603	Guatemala	1
PI289207	Saint Pierre	Solanum lycopersicum L.	Hungary	7	8.22222	7.44444	9	32.7185	12.7159	20.0026	61.0496	38.9504	24.9778	11.5667	13.4111	53.6922	46.3078	Hungary	2
PI321064	G 14406	Solanum lycopersicum L.	Hungary	7.77778	9	7.66667	9	31.9889	12.7081	19.2807	60.2414	39.7586	25.2222	10.4444	14.7778	58.5903	41.4097
PI237137	San Marzano	Solanum lycopersicum L.	Italy	6.44444	9	7.22222	9	32.0556	12.707	19.3485	60.3623	39.6377	26.7	10.1778	16.5222	61.881	38.119	Italy	2
PI639215	Principe Borghese	Solanum lycopersicum L. var. lycopersicum	Italy	7.88889	9	7.88889	9	31.6963	12.9019	18.7944	59.282	40.718	30.6444	12.7	17.9444	58.5569	41.4431
PI438877	Tomato Guajito	Solanum lycopersicum L.	Mexico	7.44444	9	7.33333	9	30.0519	12.4963	17.5556	58.3622	41.6378	28.5556	11.4222	17.1333	60	40	Mexico	4
PI438859	Tomate Bola Kanacin	Solanum lycopersicum L.	Mexico	7.22222	9	7.22222	9	32.7474	12.6711	20.0763	61.1941	38.8059	30.7778	11.3333	19.4444	63.1769	36.8231
PI452027	M 7281	Solanum lycopersicum L.	Mexico	8.22222	9	8.22222	9	31.2481	12.2685	18.9796	60.7166	39.2834	31.1111	13.0889	18.0222	57.9286	42.0714
PI452026	M 7280	Solanum lycopersicum L.	Mexico	8.11111	9	8.11111	9	32.7889	11.933	20.8559	63.4587	36.5413	27.2222	10.8444	16.3778	60.1633	39.8367
PI286426	No Known Plant ID	Solanum lycopersicum L.	Nepal	7.66667	9	8	9	33.6037	12.8367	20.767	61.8321	38.1679	32.2778	12.9889	19.2889	59.759	40.241	Nepal	1
PI262995	Ailsa Craig	Solanum lycopersicum L.	Netherlands	6.33333	7.88889	7.66667	9	31.2148	12.8107	18.4041	58.9433	41.0567	28.4111	11.9778	16.4333	57.8412	42.1588	Netherlands	1
PI406967	W-C 1564	Solanum lycopersicum L.	Nicaragua	8	9	8	9	30.0815	12.04	18.0415	59.8951	40.1049	22.3333	10.8111	11.5222	51.592	48.408	Nicaragua	2
PI196297	2927	Solanum lycopersicum L.	Nicaragua	7.77778	8.66667	9	9	31.4781	11.7593	19.7189	62.6983	37.3017	25.3889	11.7	13.6889	53.9168	46.0832
PI365956	LA1373	Solanum peruvianum L.	Lima, Peru	1.88889	2.66667	2	3.88889	31.3556	20.267	11.0885	35.3648	64.6352	27.2222	13.5333	13.6889	50.2857	49.7143	Peru	5
PI127825	Ccoilo-Chuma	Solanum lycopersicum L.	Peru	6.66667	8	6.66667	8.22222	29.4952	12.7159	16.7793	56.8188	43.1812	23.9111	12.0222	11.8889	49.7212	50.2788
PI258478	LA0394	Solanum lycopersicum L.	Peru	6.44444	7.11111	7.11111	8.55556	31.5259	11.9607	19.5652	62.0088	37.9912	30.6667	15.0111	15.6556	51.0507	48.9493
PI390643	Kilo	Solanum lycopersicum L.	Peru	7.11111	9	7.33333	9	31.8556	12.5607	19.2948	60.6327	39.3673	24.1111	10.3222	13.7889	57.1889	42.8111
PI258484	LA0457-6	Solanum lycopersicum L.	Peru	8	9	8	9	34.637	12.1433	22.4937	64.8402	35.1598	27.2222	11.3667	15.8556	58.2449	41.7551
PI639208	Black from Tula	Solanum lycopersicum L. var. lycopersicum	Tula, Russian Federation	7.88889	8.77778	7.88889	8.77778	32.1556	12.7274	19.4281	60.4693	39.5307	28.5	11.0667	17.4333	61.1696	38.8304	Russian Federation	1
PI499370	Prevoskhodnyi 176	Solanum lycopersicum L.	Former, Soviet Union	8	9	8	9	30.537	12.4156	18.1215	59.3458	40.6542	23.3333	14	9.33333	40	60	Soviet Union	2
PI102713	Tshudorynka	Solanum lycopersicum L.	Former, Soviet Union	8	8.22222	8	8.22222	33.8148	12.9393	20.8756	61.7022	38.2978	25.5556	10.7444	14.8111	57.9565	42.0435
PI647305	Rosa o Monserrat	Solanum lycopersicum L.	Spain	5.44444	9	6.66667	8.66667	30.9926	12.7133	18.2793	58.8471	41.1529	29.9444	11.5778	18.3667	61.3358	38.6642	Spain	2
PI339938	Tres Cantos	Solanum lycopersicum L.	Spain	7	8.22222	7.11111	8.33333	33.5704	12.8811	20.6893	61.6278	38.3722	31.1111	11.5556	19.5556	62.8571	37.1429
PI286255	Moneymaker	Solanum lycopersicum L.	United Kingdom	7.55556	9	7.66667	9	31.8407	12.6778	19.163	60.1421	39.8579	29.2222	10.5333	18.6889	63.9544	36.0456	United Kingdom	2
PI584456	Allure	Solanum lycopersicum L.	United States	2.66667	3.11111	2.22222	3.77778	31.1407	19.5119	11.6289	37.2445	62.7555	11.8333	6.5	5.33333	45.0704	54.9296	United States	14
PI330725	Stick Tomato	Solanum lycopersicum L.	United States	3.77778	6.55556	4.33333	5.66667	32.4704	13.7041	18.7663	57.7227	42.2773	20.5556	12.3667	8.18889	39.8378	60.1622
PI193400	Mac A 741	Solanum lycopersicum L.	Ohio, United States	4.44444	6.77778	5	5.77778	30.1407	12.3244	17.8163	59.0118	40.9882	28.1111	11.8333	16.2778	57.9051	42.0949
PI193399	Mac A 706	Solanum lycopersicum L.	Ohio, United States	4.44444	8.33333	4.88889	5.88889	31.5333	12.257	19.2763	61.2433	38.7567	31.2222	11.4	19.8222	63.4875	36.5125
PI303811	Yellow Plum	Solanum lycopersicum L.	United States	6.77778	8	6.66667	8	31.7333	12.3052	19.4281	61.2213	38.7787	24.9444	10.9222	14.0222	56.2138	43.7862
PI600930	Moran 3053	Solanum lycopersicum L.	United States	5.33333	9	7.22222	8.66667	31.8037	12.5563	19.2474	60.4474	39.5526	27.1	10.8556	16.2444	59.9426	40.0574
PI547075	NC 1C	Solanum lycopersicum L.	North Carolina, United States	6.77778	8.55556	6.88889	8.55556	32.8519	13.1085	19.7433	60.0974	39.9026	24.5556	11.8333	12.7222	51.81	48.19
PI303810	Yellow Pear	Solanum lycopersicum L.	United States	7	8.55556	7.77778	9	32.0963	12.7704	19.3259	60.0352	39.9648	25.7778	11.2333	14.5444	56.4224	43.5776
PI600901	Peto 94-C	Solanum lycopersicum L.	United States	5.77778	7	7	9	34.0148	12.5207	21.4941	63.266	36.734	22.2	10.9667	11.2333	50.6006	49.3994
PI644750	Giant Tree	Solanum lycopersicum L.	Virginia, United States	8	9	8	9	31.4667	12.8604	18.6063	59.0699	40.9301	30.6667	10.8333	19.8333	64.6739	35.3261
PI647566	Flora-dade	Solanum lycopersicum L.	United States	7.33333	9	7	9	33.3481	12.9193	20.4289	61.2305	38.7695	27.3333	10.1	17.2333	63.0488	36.9512
PI600907	Cherokee	Solanum lycopersicum L.	North Carolina, United States	7	8.66667	7.88889	8.66667	34.0593	11.8948	22.1644	65.058	34.942	25.7778	10.4667	15.3111	59.3966	40.6034
PI600906	NC 50-7	Solanum lycopersicum L.	North Carolina, United States	8	9	8	9	34.3148	11.7256	22.5893	65.3557	34.6443	16.8333	10.1444	6.68889	39.736	60.264
PI634828	Ponderosa Red	Solanum lycopersicum L.	Missouri, United States	8.88889	9	9	9	32.7296	12.3956	20.3341	62.1131	37.8869	24.7778	11.0667	13.7111	55.3363	44.6637
LW-d6 = leaf wilting in day 7 after drought treatment based on 0 - 9 scale; LW-d10 = leaf wilting in day 10 after drought treatment based on 0-9 scale. LR-d6 = leaf rolling in day 7 after drought treatment based on 1-9 scale. LR-d10 = leaf rolling in day 10 after drought treatment based on 1-9 scale. SPAD_healthy = leaf chlorophyll content in healthy without drought stress, measured by the SPAD-5…

## Sheet: S2.Table_parameter
Supplementary Table S2. Parameters of 14 traits for drought tolerance in 68 tomato accessions.
Parameter	N	Mean	Min	Max	Range	Variance	Std Dev	Std Err	CV
LW-d6	68	6.93137	1.88889	8.88889	7	2.23624	1.49541	0.181345	21.5744
LW-d10	68	8.35784	2.66667	9	6.33333	1.9314	1.38975	0.168532	16.6281
LR-d6	68	7.20098	2	9	7	2.14787	1.46556	0.177726	20.3523
LR-d10	68	8.44608	3.44444	9	5.55556	1.8841	1.37262	0.166455	16.2516
PlHt_healthy	68	26.5809	11.8333	34.2222	22.3889	16.1405	4.01752	0.487196	15.1143
PlHt_stress	68	11.5284	6.5	15.0111	8.51111	1.71915	1.31117	0.159002	11.3733
PlHt_AD	68	15.0525	5.33333	21.5444	16.2111	11.6033	3.40637	0.413083	22.63
PlHt_II	68	55.9665	39.736	64.6739	24.9379	36.2171	6.01807	0.729798	10.753
PlHt_RDT	68	44.0335	35.3261	60.264	24.9379	36.2171	6.01807	0.729798	13.667
SPAD_healthy	68	32.114	29.4952	34.637	5.14185	1.71351	1.30901	0.158741	4.07614
SPAD_stress	68	12.8758	11.107	20.267	9.16	2.7639	1.6625	0.201607	12.9118
SPAD_AD	68	19.2382	11.0885	22.6296	11.5411	4.39373	2.09612	0.254192	10.8956
SPAD_II	68	59.8006	35.3648	66.4451	31.0802	28.8866	5.37462	0.651769	8.98758
SPAD_RDT	68	40.1994	33.5549	64.6352	31.0802	28.8866	5.37462	0.651769	13.3699

## Sheet: S3_Table_r
Supplementary Table S3. Correlation coefficients (r-value) and their propability (P-value) among 14 drought tolerance related traits in 68 tomato accessions.
Correlation coefficients (r-value)	LW-d6	LW-d10	LR-d6	LR-d10	SPAD_AD	SPAD_II	SPAD_RDT	PlHt_AD	PlHt_II	PlHt_RDT	PlHt_healthy	PlHt_stress	SPAD_healthy	SPAD_stress
LW-d6	1	0.854918	0.945106	0.871091	0.603346	0.709324	-0.709324	0.149976	0.145207	-0.145207	0.151113	0.0733915	0.0392362	-0.729822
LW-d10	0.854918	1	0.895631	0.915792	0.683814	0.842327	-0.842327	0.237462	0.246874	-0.246874	0.214482	0.0402732	-0.0324428	-0.887716
LR-d6	0.945106	0.895631	1	0.933672	0.68616	0.802348	-0.802348	0.137203	0.137066	-0.137066	0.143581	0.0834949	0.0572043	-0.820088
LR-d10	0.871091	0.915792	0.933672	1	0.670829	0.810396	-0.810396	0.145925	0.149447	-0.149447	0.151205	0.0841947	-0.00618945	-0.850673
SPAD_AD	0.603346	0.683814	0.68616	0.670829	1	0.931477	-0.931477	0.0363278	0.0659497	-0.0659497	0.0310292	0.000697576	0.609243	-0.781124
SPAD_II	0.709324	0.842327	0.802348	0.810396	0.931477	1	-1	0.105998	0.107455	-0.107455	0.115394	0.0781961	0.281079	-0.953118
SPAD_RDT	-0.709324	-0.842327	-0.802348	-0.810396	-0.931477	-1	1	-0.105998	-0.107455	0.107455	-0.115394	-0.0781961	-0.281079	0.953118
PlHt_AD	0.149976	0.237462	0.137203	0.145925	0.0363278	0.105998	-0.105998	1	0.90478	-0.90478	0.950836	0.315472	-0.103314	-0.12715
PlHt_II	0.145207	0.246874	0.137066	0.149447	0.0659497	0.107455	-0.107455	0.90478	1	-1	0.739043	-0.0861019	-0.0317918	-0.108183
PlHt_RDT	-0.145207	-0.246874	-0.137066	-0.149447	-0.0659497	-0.107455	0.107455	-0.90478	-1	1	-0.739043	0.0861019	0.0317918	0.108183
PlHt_healthy	0.151113	0.214482	0.143581	0.151205	0.0310292	0.115394	-0.115394	0.950836	0.739043	-0.739043	1	0.593843	-0.13646	-0.146568
PlHt_stress	0.0733915	0.0402732	0.0834949	0.0841947	0.000697576	0.0781961	-0.0781961	0.315472	-0.0861019	0.0861019	0.593843	1	-0.149718	-0.118764
SPAD_healthy	0.0392362	-0.0324428	0.0572043	-0.00618945	0.609243	0.281079	-0.281079	-0.103314	-0.0317918	0.0317918	-0.13646	-0.149718	1	0.0192248
SPAD_stress	-0.729822	-0.887716	-0.820088	-0.850673	-0.781124	-0.953118	0.953118	-0.12715	-0.108183	0.108183	-0.146568	-0.118764	0.0192248	1
Propability (P-Value)	LW-d6	LW-d10	LR-d6	LR-d10	SPAD_AD	SPAD_II	SPAD_RDT	PlHt_AD	PlHt_II	PlHt_RDT	PlHt_healthy	PlHt_stress	SPAD_healthy	SPAD_stress
LW-d6	0	1.75479e-20	8.98831e-34	4.64449e-22	5.16305e-08	1.28618e-11	1.28618e-11	0.222191	0.23741	0.23741	0.218664	0.551988	0.750733	1.661e-12
LW-d10	1.75479e-20	0	6.53891e-25	7.61384e-28	1.30136e-10	2.21613e-19	2.21613e-19	0.0511946	0.0424009	0.0424009	0.0790239	0.744367	0.792828	6.41069e-24
LR-d6	8.98831e-34	6.53891e-25	0	3.85448e-31	1.06226e-10	1.95031e-16	1.95031e-16	0.264543	0.265024	0.265024	0.242761	0.498447	0.643112	1.18481e-17
LR-d10	4.64449e-22	7.61384e-28	3.85448e-31	0	3.87331e-10	5.67568e-17	5.67568e-17	0.235074	0.223846	0.223846	0.218382	0.494841	0.960048	4.23415e-20
SPAD_AD	5.16305e-08	1.30136e-10	1.06226e-10	3.87331e-10	0	1.08953e-30	1.08953e-30	0.768674	0.59311	0.59311	0.801667	0.995495	3.52307e-08	3.91972e-15
SPAD_II	1.28618e-11	2.21613e-19	1.95031e-16	5.67568e-17	1.08953e-30	0	0	0.38962	0.3831	0.3831	0.34873	0.526187	0.0202391	5.5976e-36
SPAD_RDT	1.28618e-11	2.21613e-19	1.95031e-16	5.67568e-17	1.08953e-30	0	0	0.38962	0.3831	0.3831	0.34873	0.526187	0.0202391	5.5976e-36
PlHt_AD	0.222191	0.0511946	0.264543	0.235074	0.768674	0.38962	0.38962	0	3.67668e-26	3.67668e-26	2.59111e-35	0.00878006	0.401806	0.301479
PlHt_II	0.23741	0.0424009	0.265024	0.223846	0.59311	0.3831	0.3831	3.67668e-26	0	0	6.21909e-13	0.485084	0.796896	0.379866
PlHt_RDT	0.23741	0.0424009	0.265024	0.223846	0.59311	0.3831	0.3831	3.67668e-26	0	0	6.21909e-13	0.485084	0.796896	0.379866
PlHt_healthy	0.218664	0.0790239	0.242761	0.218382	0.801667	0.34873	0.34873	2.59111e-35	6.21909e-13	6.21909e-13	0	9.40609e-08	0.267166	0.232998
PlHt_stress	0.551988	0.744367	0.498447	0.494841	0.995495	0.526187	0.526187	0.00878006	0.485084	0.485084	9.40609e-08	0	0.222997	0.334739
SPAD_healthy	0.750733	0.792828	0.643112	0.960048	3.52307e-08	0.0202391	0.0202391	0.401806	0.796896	0.796896	0.267166	0.222997	0	0.876343
SPAD_stress	1.661e-12	6.41069e-24	1.18481e-17	4.23415e-20	3.91972e-15	5.5976e-36	5.5976e-36	0.301479	0.379866	0.379866	0.232998	0.334739	0.876343	0

## Sheet: S4.Table_ANOVA
Supplementary Table S4. ANOVA for the parameters of drought tolerance and board sense heritability estimation in 68 tomato accessions.
Parameter	Source	DF	Sum of Squares	Mean Square	F Ratio	Prob > F	EMS	H%	Comment
LW-d6	Block	2	6.52373	3.26186	2.1481	0.1727
	Accession	68	441.79	6.49691	4.2785	0.0116	σ2e + rσ2GE + rbσ2G	52.2175
	Accession*Block	136	57.6718	0.424057	0.2793	0.9995	σ2e + rσ2GE		No significant interaction, σ2GE = 0
	Error	9	13.6667	1.51852			σ2e
LW-d10	Block	2	1.00521	0.502605	2.2617	0.16
	Accession	68	389.172	5.72312	25.7541	<.0001	σ2e + rσ2GE + rbσ2G	89.1909
	Accession*Block	136	21.394	0.157309	0.7079	0.8115	σ2e + rσ2GE		No significant interaction, σ2GE = 0
	Error	9	2	0.22222			σ2e
LR-d6	Block	2	3.05871	1.52936	1.8913	0.2062
	Accession	68	426.837	6.27702	7.7624	0.0012	σ2e + rσ2GE + rbσ2G	69.27
	Accession*Block	136	23.6903	0.174194	0.2154	1	σ2e + rσ2GE		No significant interaction, σ2GE = 0
	Error	9	7.2778	0.80864			σ2e
LR_d10	Block	2	0.22414	0.11207	0.5857	0.5766
	Accession	68	379.37	5.57898	29.1546	<.0001	σ2e + rσ2GE + rbσ2G	90.3705
	Accession*Block	136	7.2963	0.0536493	0.2804	0.9995	σ2e + rσ2GE		No significant interaction, σ2GE = 0
	Error	9	1.7222	0.19136			σ2e
PLHT_healthy	Block	2	239.917	119.959	16.532	0.001
	Accession	68	3398.13	49.9725	6.8869	0.0019	σ2e + rσ2GE + rbσ2G	64.1022
	Accession*Block	136	1623.49	11.9374	1.6451	0.2113	σ2e + rσ2GE
	Error	9	65.3056	7.25617			σ2e
PlHt_stress	Block	2	1.79251	0.896255	1.175	0.3521
	Accession	68	346.978	5.10261	6.6895	0.0022	σ2e + rσ2GE + rbσ2G	62.3842
	Accession*Block	136	173.721	1.27736	1.6746	0.2023	σ2e + rσ2GE
	Error	9	6.865	0.76278			σ2e
PlHt_AD	Block	2	1.79251	0.896255	1.1019	0.3732
	Accession	68	2457.29	36.1367	44.427	<.0001	σ2e + rσ2GE + rbσ2G	94.0502
	Accession*Block	136	173.721	1.27736	1.5704	0.236	σ2e + rσ2GE
	Error	9	7.3206	0.8134			σ2e
PlHt_II	Block	2	26.299	13.1495	1.4655	0.2812
	Accession	68	7527.94	110.705	12.3376	0.0002	σ2e + rσ2GE + rbσ2G	70.2952
	Accession*Block	136	2572	18.9118	2.1076	0.1103	σ2e + rσ2GE
	Error	9	80.7568	8.97297			σ2e
PlHt_RDT	Block	2	26.299	13.1495	1.4655	0.2812
	Accession	68	7527.94	110.705	12.3376	0.0002	σ2e + rσ2GE + rbσ2G	70.2952
	Accession*Block	136	2572	18.9118	2.1076	0.1103	σ2e + rσ2GE
	Error	9	80.7568	8.97297			σ2e
SPAD_healthy	Block	2	8.98182	4.49091	1.83	0.2153
	Accession	68	337.528	4.96365	2.0227	0.1266	σ2e + rσ2GE + rbσ2G	25.4226
	Accession*Block	136	302.725	2.22592	0.9071	0.6348	σ2e + rσ2GE		No significant interaction, σ2GE = 0
	Error	9	22.0861	2.45401			σ2e
SPAD_stress	Block	2	39.5321	19.7661	21.8092	0.0004
	Accession	68	559.058	8.22144	9.0712	0.0006	σ2e + rσ2GE + rbσ2G	72.2199
	Accession*Block	136	199.906	1.4699	1.6218	0.2187	σ2e + rσ2GE
	Error	9	8.1569	0.90632			σ2e
SPAD_AD	Block	2	40.2261	20.1131	5.9372	0.0227
	Accession	68	880.333	12.9461	3.8216	0.0174	σ2e + rσ2GE + rbσ2G	48.4674
	Accession*Block	136	458.938	3.37454	0.9961	0.5599	σ2e + rσ2GE		No significant interaction, σ2GE = 0
	Error	9	30.4887	3.38764			σ2e
SPAD_II	Block	2	379.447	189.724	15.8447	0.0011
	Accession	68	5838.25	85.8567	7.1703	0.0017	σ2e + rσ2GE + rbσ2G	73.5157
	Accession*Block	136	2221.09	16.3315	1.3639	0.3221	σ2e + rσ2GE
	Error	9	107.766	11.974			σ2e
SPAD_RDT	Block	2	379.447	189.724	15.8447	0.0011
	Accession	68	5838.25	85.8567	7.1703	0.0017	σ2e + rσ2GE + rbσ2G	73.5157
	Accession*Block	136	2221.09	16.3315	1.3639	0.3221	σ2e + rσ2GE
	Error	9	107.766	11.974			σ2e

## Sheet: S5_Table_rank
Supplementary Table S5. The ranks of the 68 tomato accessions for their drought torance in each of the eight traits plus the averages of six and eight traits, respectively.
Accession	LW-d6	LW-d10	LR-d6	LR-d10	SPAD_AD	SPAD_II	PlHt_AD	PlHt_II	PlHt_RDT	SPAD_RDT	Rank(8)	Rank(6)
PI365956	1	1	1	4	1	1	21	11	11	1	2	1
PI584456	3	2	2	2	2	2	1	5	5	2	1	1
PI370091	2	4	3	1	3	3	52	58	58	3	6	3
PI390510	4	3	4	2	4	4	36	31	31	4	5	4
PI330725	5	5	5	5	21	7	4	2	2	7	3	5
PI193400	6	6	7	6	10	15	40	35	35	15	6	5
PI127825	18	11	9	10	5	5	12	10	10	5	4	7
PI647305	9	28	9	15	14	13	57	57	57	13	16	8
PI451967	32	26	12	19	6	6	41	24	24	6	10	9
PI262995	14	10	35	22	16	14	44	34	34	14	13	10
PI466917	28	28	22	22	7	8	38	43	43	8	16	10
PI193399	6	17	6	7	31	48	66	66	66	48	34	10
PI303811	20	11	9	8	40	45	26	29	29	45	13	13
PI438877	38	28	26	22	9	10	48	51	51	10	27	13
PI647122	17	9	15	22	34	37	16	13	13	37	8	13
PI639213	32	28	26	22	15	12	58	60	60	12	36	16
PI600930	8	28	22	15	30	34	39	50	50	34	23	16
PI547075	20	19	13	13	46	27	14	16	16	27	10	16
PI647445	32	13	39	9	28	24	7	7	7	24	8	19
PI258478	15	8	19	13	43	52	33	14	14	52	16	20
PI258474	23	28	63	22	8	9	62	54	54	9	40	21
PI237137	15	28	22	22	36	32	46	59	59	32	37	21
PI438587	12	28	8	22	29	56	60	55	55	56	40	21
PI636277	28	19	26	22	22	39	59	65	65	39	45	21
PI279817	39	28	33	22	19	16	32	49	49	16	31	21
PI303810	23	19	39	22	35	26	27	32	32	26	23	26
PI433016	50	28	45	22	13	11	68	62	62	11	47	27
PI600901	11	7	15	22	60	57	10	12	12	57	13	28
PI339938	23	14	19	12	55	49	65	61	61	49	47	28
PI647453	19	28	19	22	45	40	20	30	30	40	23	28
PI390643	28	28	26	22	33	36	24	33	33	36	27	28
PI499370	50	28	45	22	12	19	6	3	3	19	12	28
PI639215	46	28	41	22	23	18	53	44	44	18	40	33
PI289207	23	14	31	22	48	41	18	18	18	41	20	33
PI286255	39	28	35	22	27	28	61	67	67	28	51	33
PI644750	50	28	45	22	18	17	67	68	68	17	53	33
PI406967	50	28	45	22	11	25	11	15	15	25	19	33
PI451962	28	28	31	22	25	47	15	28	28	47	23	33
PI109836	50	28	45	22	17	21	30	25	25	21	31	39
PI441739	46	28	33	22	41	20	55	27	27	20	40	40
PI321064	43	28	35	22	32	31	28	45	45	31	37	40
PI250436	50	28	45	22	24	23	19	23	23	23	27	40
PI645361	10	17	13	22	68	67	8	8	8	67	20	43
PI438859	32	28	22	22	49	44	64	64	64	44	58	43
PI505317	39	19	41	21	37	42	47	22	22	42	40	43
PI647566	37	28	15	22	52	46	49	63	63	46	53	43
PI279815	43	28	35	22	42	33	3	6	6	33	20	47
PI639208	46	26	41	19	39	35	51	56	56	35	53	47
PI158760	32	23	15	15	61	68	25	21	21	68	37	49
PI291337	12	28	26	22	65	64	13	9	9	64	31	49
PI451970	65	28	63	22	20	22	5	4	4	22	27	51
PI109831	50	28	45	22	47	29	45	41	41	29	51	51
PI212062	23	28	45	22	53	54	9	17	17	54	34	53
PI102713	50	14	45	10	58	50	29	38	38	50	47	53
PI600907	23	23	41	15	63	65	31	47	47	65	53	53
PI339914	50	28	45	22	50	43	50	39	39	43	58	56
PI452027	64	28	62	22	26	38	54	36	36	38	58	56
PI286426	42	28	45	22	56	51	63	48	48	51	64	58
PI647447	65	28	63	22	38	30	37	42	42	30	58	58
PI196297	43	23	66	22	44	55	22	19	19	55	47	60
PI367937	50	28	45	22	54	59	35	20	20	59	53	61
PI273115	50	28	45	22	59	60	56	46	46	60	66	62
PI330342	50	28	45	22	64	61	17	37	37	61	58	63
PI258484	50	28	45	22	66	63	34	40	40	63	64	64
PI600906	50	28	45	22	67	66	2	1	1	66	45	64
PI634828	67	28	66	22	51	53	23	26	26	53	63	66
PI452026	63	28	61	22	57	58	43	52	52	58	67	66
PI647531	67	28	66	22	62	62	42	53	53	62	68	68
* LW-d6 = leaf wilting in day 7 after drought treatment; LW-d10 = leaf wilting in day 10 after drought treatment; LR-d6 = leaf rolling in day 7 after drought treatment; LR-d10 = leaf rolling in day 10 after drought treatment; SPAD_AD = Absolute decrease in leaf chlorophyll content measured by the SPAD-502 Plus Chlorophyll Meter (Spectrum Technologies, Inc., Plainfield, IL); SPAD_II = Inhibition I…
